# Supplementary material for: Spray deposited β-Bi2O3 nanostructured films with visible photocatalytic activity for solar water treatment
Source: Royal Society of Chemistry journal article supplement (doi:10.1039/c4pp00367e), 2015-04-24
Supplement: c4pp00367e1.pdf [file c4pp00367e1.pdf]

## Spray deposited $\beta$ - $\text{Bi}_2\text{O}_3$ nanostructured films with visible photocatalytic activity for solar water treatment

Karen Barrera-Mota<sup>1</sup>, Monserrat Bizarro<sup>1\*</sup>, Micaela Castellino<sup>2</sup>, Alberto Tagliaferro<sup>3</sup>, Aracely Hernández<sup>4</sup>, Sandra E. Rodil<sup>1</sup>

### Electronic Supplementary Information

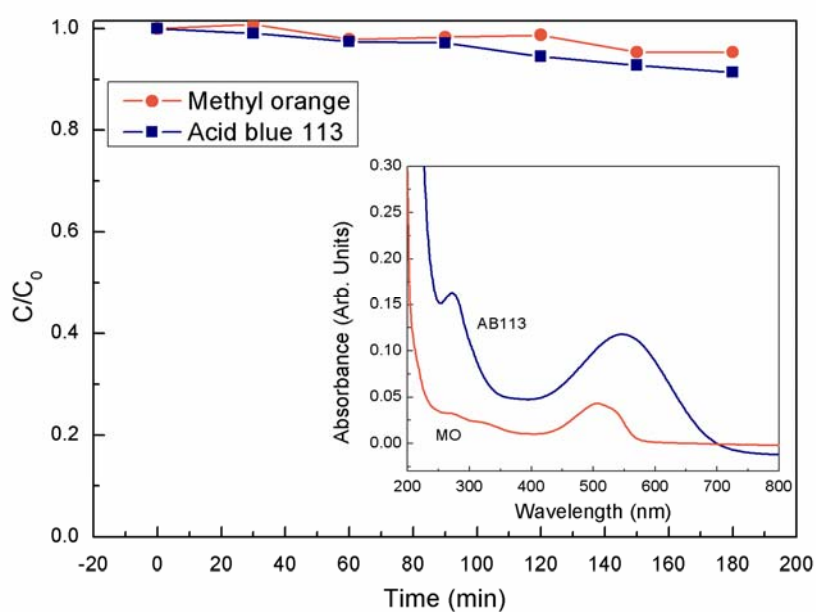

Fig. A Photolytic behavior of the dyes exposed to UV light during 3 hours. The inset shows the absorption spectrum of each dye.

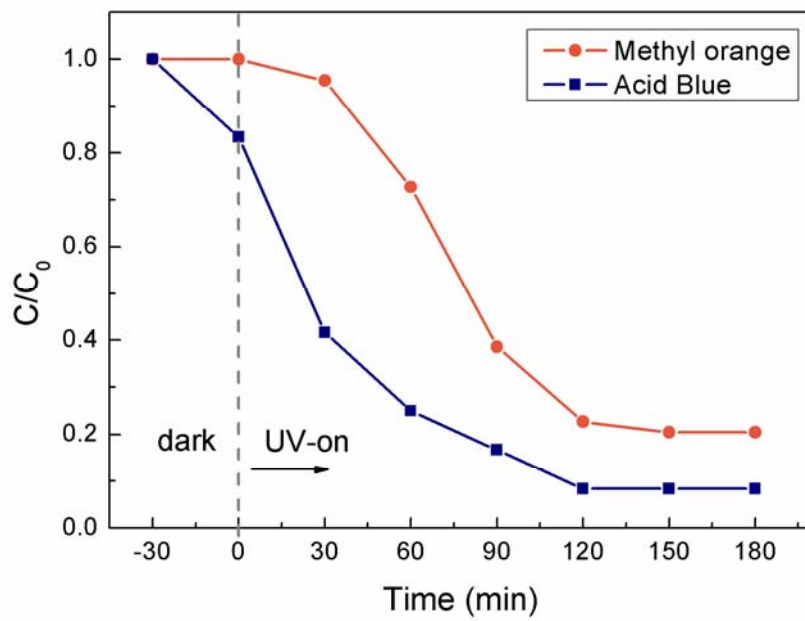

Fig. B Comparison of the degradation process of methyl orange and acid blue 113 under UV light. The  $\text{Bi}_2\text{O}_3$  films were left in contact with the dye solution in the dark to evaluate the adsorption of the molecule to the film.
